# Supplementary material for: ShellChron 0.4.0: a new tool for constructing chronologies in accretionary carbonate archives from stable oxygen isotope profiles
Source: Copernicus journal article supplement (doi:10.5194/gmd-15-1247-2022), 2022-02-10
Supplement: Supplementary file 2 [file gmd-15-1247-2022-supplement.zip]

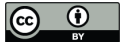

## *Supplement of*

# **ShellChron 0.4.0: a new tool for constructing chronologies in accretionary carbonate archives from stable oxygen isotope profiles**

**Niels J. de Winter**

*Correspondence to:* Niels J. de Winter ([n.j.dewinter@uu.nl](mailto:n.j.dewinter@uu.nl))

- [gmd-15-1247-2022-supplement-title-page.pdf](#)
- [FigS1\\_SST-d18Oc plot\\_rev.pdf](#)
- [FigS2\\_Growth rate plot\\_rev.pdf](#)
- [FigS3\\_Orthogonal error projection plot.pdf](#)
- [FigS4\\_Weights\\_plot.pdf](#)
- [FigS5\\_Performance time plots.pdf](#)
- [Supplementary\\_Information.docx](#)

The copyright of individual parts of the supplement might differ from the article licence.
