# Supplementary material for: ShellChron 0.4.0: a new tool for constructing chronologies in accretionary carbonate archives from stable oxygen isotope profiles
Source: Copernicus journal article supplement (doi:10.5194/gmd-15-1247-2022), 2022-02-10
Supplement: Supplementary file 4 [file gmd-15-1247-2022-supplement.zip]

**A** Example of temperature sinusoid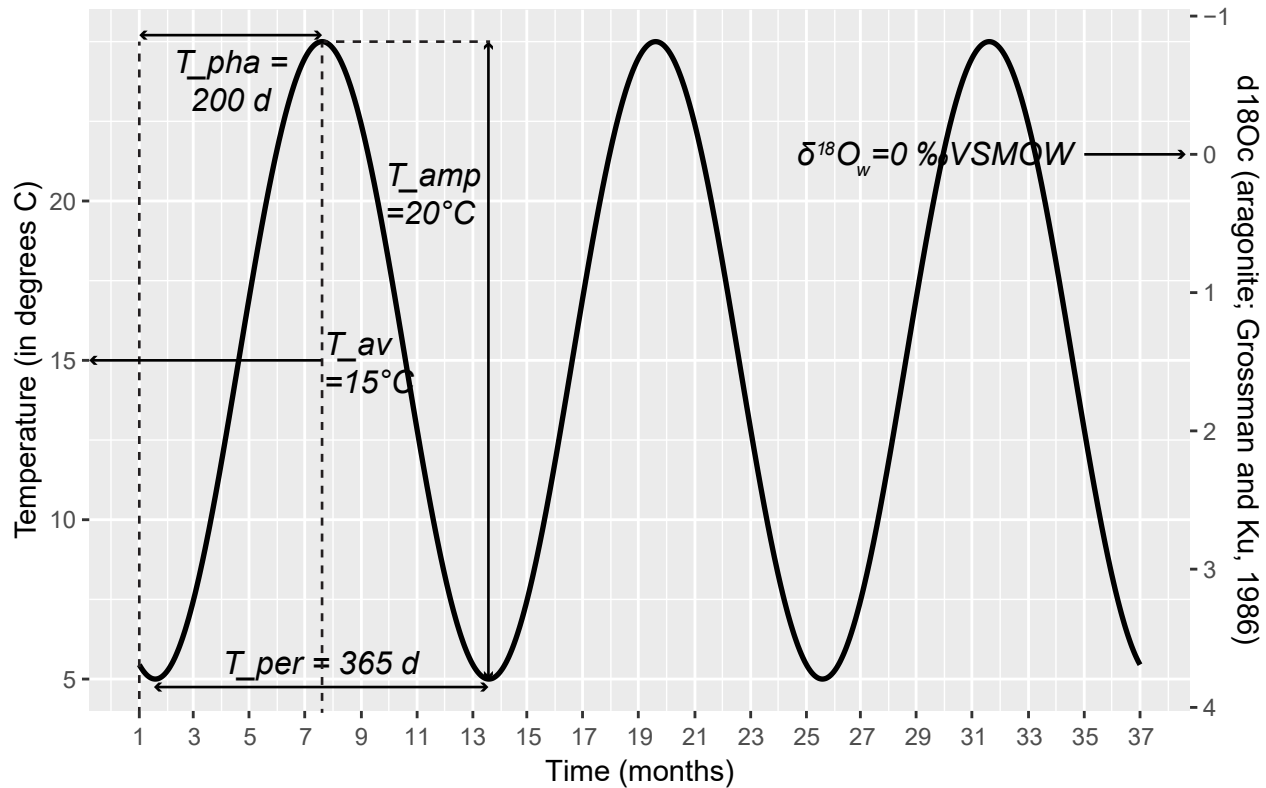**B**

| parameter                      | value |
|--------------------------------|-------|
| Temperature amplitude (°C)     | 20    |
| Temperature period (days)      | 365   |
| Temperature phase (julian day) | 200   |
| Temperature average (°C)       | 15    |
| d18Ow (permille VSMOW)         | 0     |
