# Supplementary figures and images for: ShellChron 0.4.0: a new tool for constructing chronologies in accretionary carbonate archives from stable oxygen isotope profiles
Source: Copernicus journal article supplement (doi:10.5194/gmd-15-1247-2022), 2022-02-10

**A**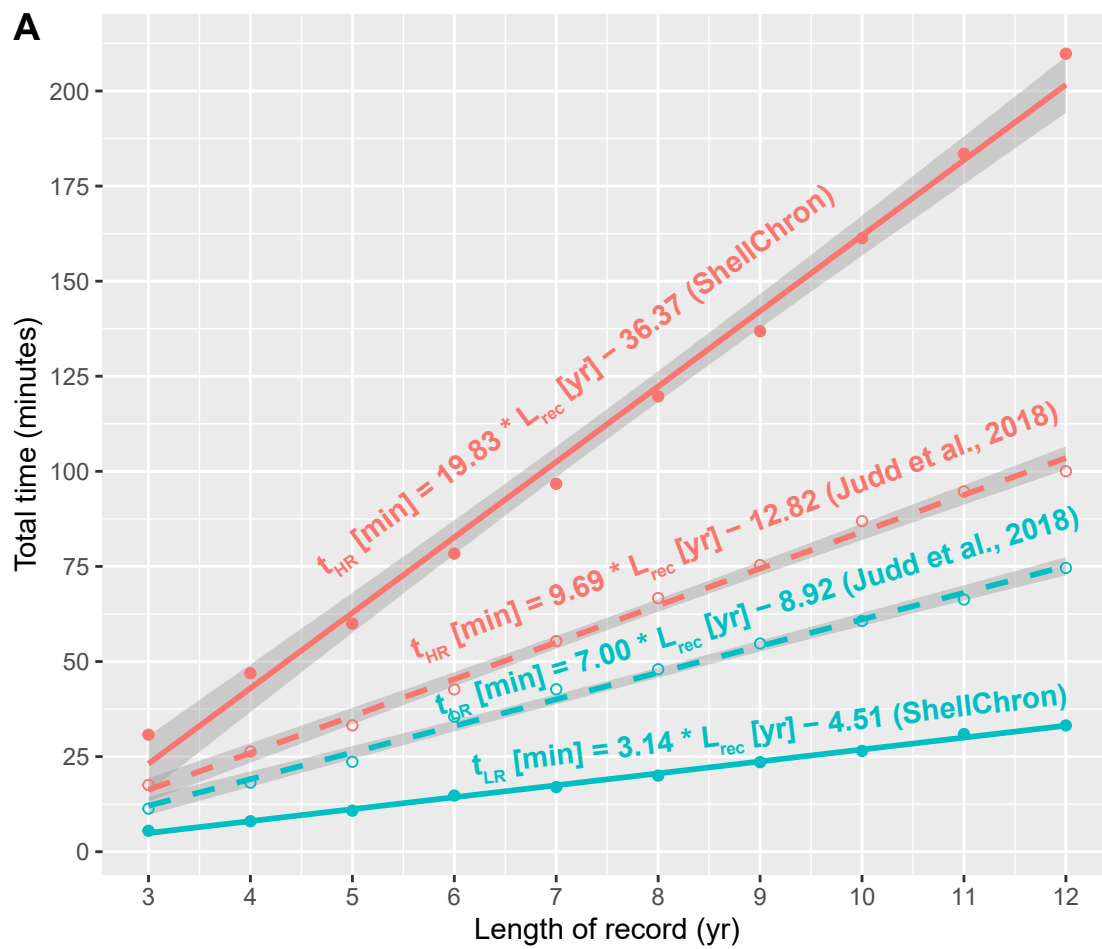**B**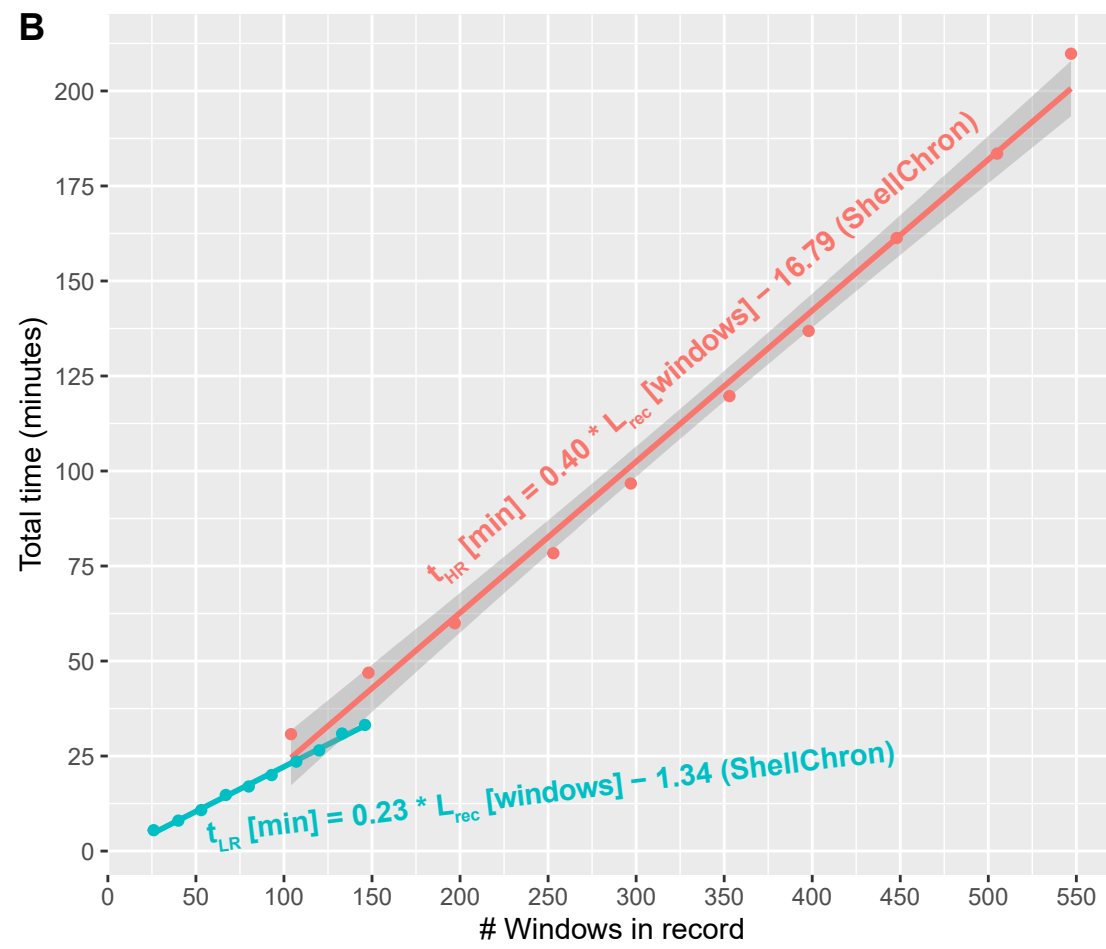**C**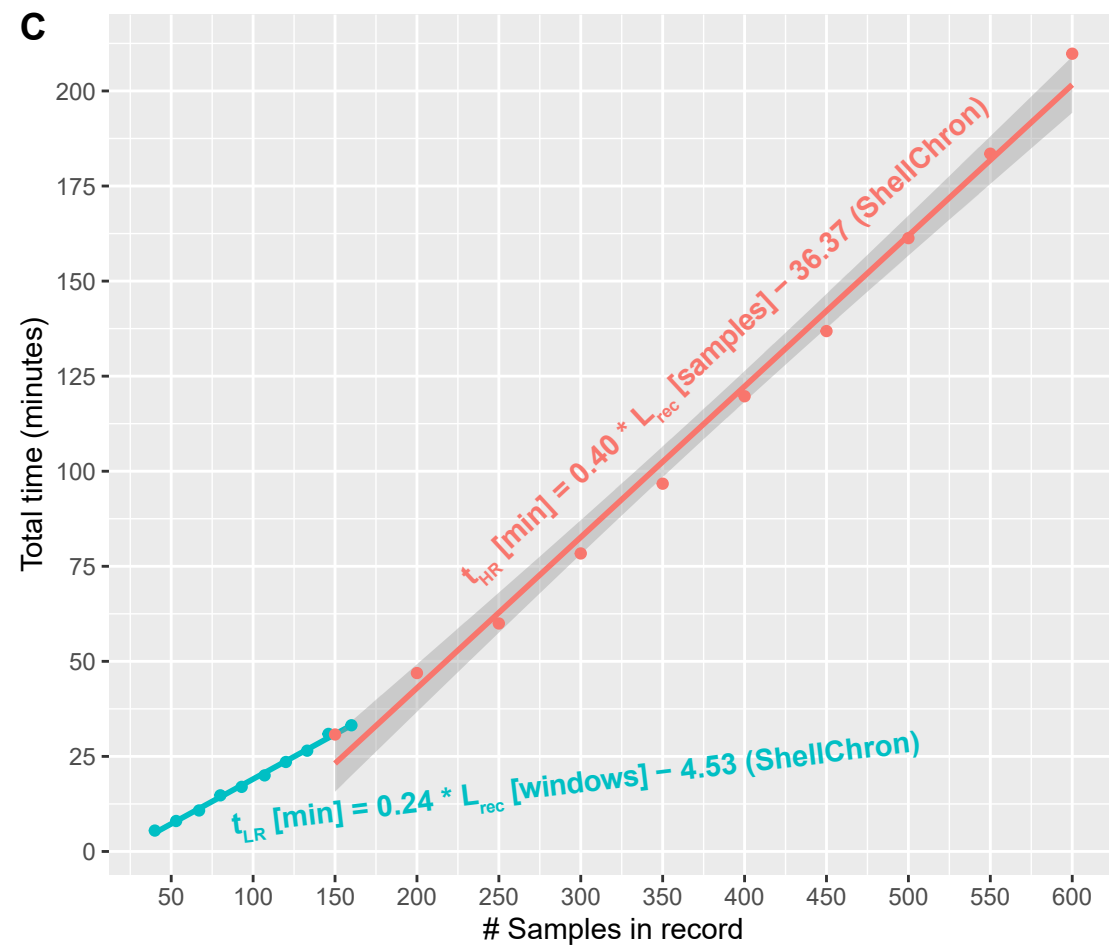

Supplement: Supplementary file 3 [file gmd-15-1247-2022-supplement.zip]
